# Supplementary material for: Microwave-assisted solid-state synthesis of NaRE(MO4)2 phosphors (RE = La, Pr, Eu, Dy; M = Mo, W)
Source: Royal Society of Chemistry journal article supplement (doi:10.1039/d0dt00999g), 2020-01-01
Supplement: d0dt00999g1.pdf [file d0dt00999g1.pdf]

## Electronic Supplementary Information

### Microwave-Assisted Solid-State Synthesis of NaRE(MO<sub>4</sub>)<sub>2</sub> Phosphors (RE = La, Pr, Eu, Dy; M = Mo, W)

S. Sameera Perera,<sup>†</sup> Hashini N. Munasinghe,<sup>†</sup> Emily N. Yatooma, and Federico A. Rabuffetti\*

Department of Chemistry, Wayne State University, Detroit, MI 48202, USA

<sup>†</sup>These authors contributed equally

\*Corresponding Author. Email: [far@chem.wayne.edu](mailto:far@chem.wayne.edu)

**Table S1.** Structural Parameters of Na<sub>2</sub>MO<sub>4</sub> and NaRE(MO<sub>4</sub>)<sub>2</sub>

| M                                        | Na <sub>2</sub> MO <sub>4</sub> |             | NaEu(MO <sub>4</sub> ) <sub>2</sub> |             | NaLa <sub>0.95</sub> Eu <sub>0.05</sub> (MO <sub>4</sub> ) <sub>2</sub> |              | NaLa <sub>0.95</sub> Pr <sub>0.025</sub> Dy <sub>0.025</sub> (MO <sub>4</sub> ) <sub>2</sub> |              |
|------------------------------------------|---------------------------------|-------------|-------------------------------------|-------------|-------------------------------------------------------------------------|--------------|----------------------------------------------------------------------------------------------|--------------|
|                                          | Mo                              | W           | Mo                                  | W           | Mo                                                                      | W            | Mo                                                                                           | W            |
| <i>a</i> (Å)                             | 9.10985(10)                     | 9.12938(12) | 5.24577(8)                          | 5.25722(8)  | 5.33755(6)                                                              | 5.35498(5)   | 5.33988(3)                                                                                   | 5.34993(5)   |
| <i>c</i> (Å)                             | –                               | –           | 11.4682(2)                          | 11.4079(2)  | 11.71844(19)                                                            | 11.65403(13) | 11.72515(8)                                                                                  | 11.64530(17) |
| <i>V</i> (Å <sup>3</sup> )               | 756.02(3)                       | 760.90(3)   | 315.582(12)                         | 315.296(12) | 333.852(10)                                                             | 334.189(8)   | 334.334(5)                                                                                   | 333.309(9)   |
| <i>x</i> O                               | 0.26172(14)                     | 0.2582(4)   | 0.1426(13)                          | 0.1470(15)  | 0.1389(11)                                                              | 0.1441(13)   | 0.1334(6)                                                                                    | 0.1432(18)   |
| <i>y</i> O                               | 0.26172(14)                     | 0.2582(4)   | 0.4663(12)                          | 0.4721(12)  | 0.4744(9)                                                               | 0.4790(11)   | 0.4847(6)                                                                                    | 0.4763(14)   |
| <i>z</i> O                               | 0.26172(14)                     | 0.2582(4)   | 0.2065(5)                           | 0.2087(6)   | 0.2073(4)                                                               | 0.2069(5)    | 0.2051(3)                                                                                    | 0.2029(7)    |
| <i>U</i> <sub>iso</sub> <sup>Na/RE</sup> | 0.46(4)                         | 0.10        | 1.34(6)                             | 2.45(9)     | 1.84(12)                                                                | 0.73(8)      | 0.30                                                                                         | 1.07(5)      |
| <i>U</i> <sub>iso</sub> <sup>M</sup>     | 0.45(4)                         | 0.10        | 1.34(6)                             | 1.20(5)     | 0.48(8)                                                                 | 1.61(5)      | 0.30                                                                                         | 1.07(5)      |
| <i>U</i> <sub>iso</sub> <sup>O</sup>     | 1.50(10)                        | 0.15        | 0.6(3)                              | 1.0(4)      | 3.0(3)                                                                  | 1.8(3)       | 0.45                                                                                         | 2.9(4)       |
| <i>R</i> <sub>wp</sub> (%)               | 5.5                             | 10.0        | 5.8                                 | 6.4         | 8.0                                                                     | 8.4          | 7.0                                                                                          | 9.6          |

*U*<sub>iso</sub> values given as 100 × *U*.

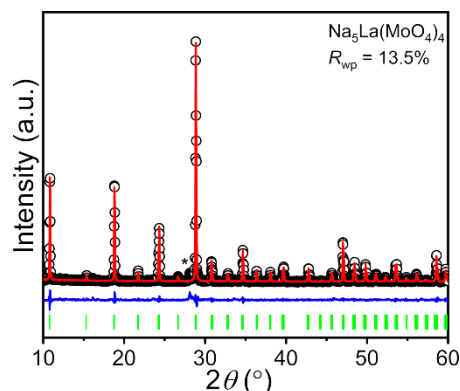

**Figure S1.** Rietveld analysis of the PXRD pattern of the quadruple molybdate  $\text{Na}_5\text{La}(\text{MoO}_4)_4$  (PDF No. 01–072–2158) obtained via microwave-assisted solid-state reaction (sample mass: 0.20 g; power: 600 W; heating profile: 9 cycles of 3 min each; total time: 27 min). Experimental data ( $\circ$ ), calculated pattern ( $—$ ), and difference curve ( $—$ , offset for clarity) are shown. Tick marks ( $|$ ) corresponding to the calculated position of the diffraction maxima are included. The peak depicted with a \* symbol corresponds to the double molybdate  $\text{NaLa}(\text{MoO}_4)_2$ , which appears as a secondary phase.

**Table S2.** Structural Parameters of  $\text{Na}_5\text{La}(\text{MoO}_4)_4$

|     | $x$        | $y$       | $z$        | $U_{\text{iso}}$ |
|-----|------------|-----------|------------|------------------|
| Na1 | 0.0        | 0.25      | 0.625      | 0.7(3)           |
| La1 | 0.0        | 0.25      | 0.125      | 0.7(3)           |
| Na2 | 0.1270(18) | 0.042(2)  | 0.3392(14) | 0.7(3)           |
| Mo1 | 0.1784(5)  | 0.3474(9) | 0.3923(4)  | 1.8(3)           |
| O1  | 0.168(3)   | 0.459(3)  | 0.484(3)   | 1.1(5)           |
| O2  | 0.149(3)   | 0.221(3)  | 0.475(3)   | 1.1(5)           |
| O3  | 0.058(3)   | 0.367(3)  | 0.295(3)   | 1.1(5)           |
| O4  | 0.317(3)   | 0.332(3)  | 0.318(2)   | 1.1(5)           |

$\text{Na}_5\text{La}(\text{MoO}_4)_4$ : space group  $I4_1/a$ ,  $a = 11.5750(2)$  Å,  $c = 11.6210(3)$  Å,  $V = 1556.99(8)$  Å<sup>3</sup>.

$U_{\text{iso}}$  values given as  $100 \times U$ .

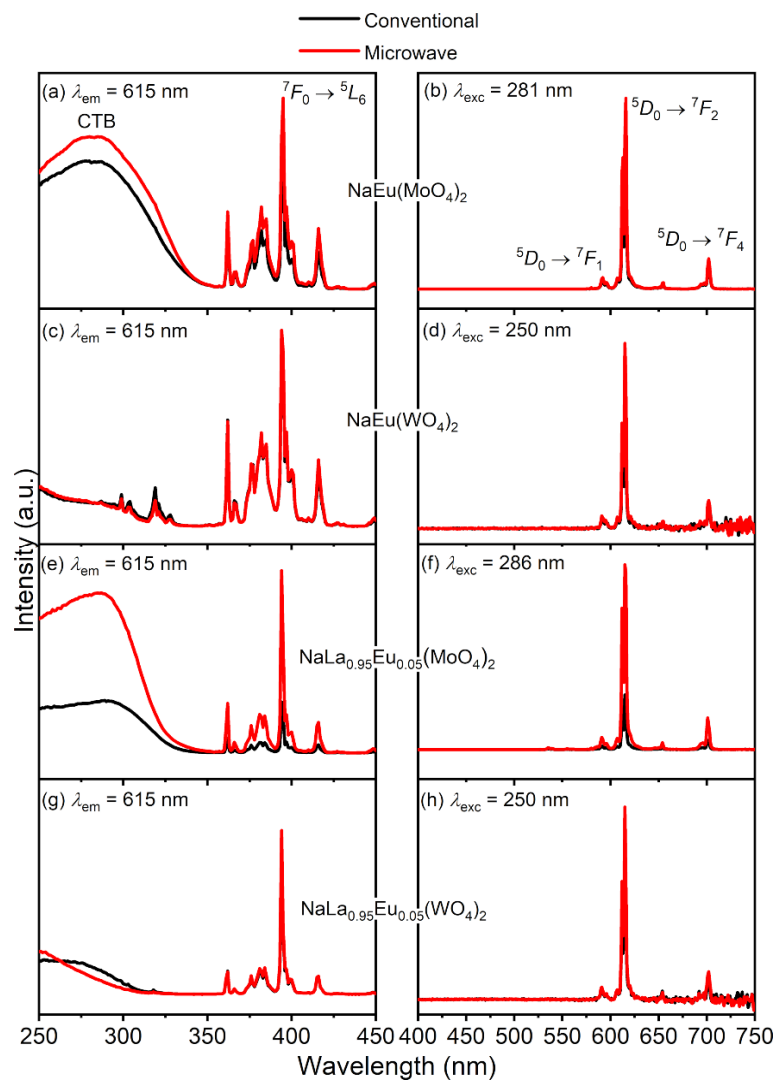

**Figure S2.** Excitation and emission spectra of  $\text{Eu}^{3+}$ -containing metalate phosphors synthesized using conventional and microwave heating. Metal-to-oxygen charge-transfer band (CTB) and selected f–f transitions of  $\text{Eu}^{3+}$  are indicated in (a) and (b).
